# Supplementary material for: Statin Use Is Associated with Decreased Risk of Invasive Mechanical Ventilation in COVID-19 Patients: A Preliminary Study
Source: PubMed Central journal article supplement (PMC7559887; doi:10.3390/pathogens9090759), 2020-09-17
Supplement: pathogens-09-00759-s001.pdf [file pathogens-09-00759-s001.pdf]

**Supplementary Table S1: Statin use and in-hospital outcomes.**

|                             | No Statin Use  | Statin Use     | p-value |
|-----------------------------|----------------|----------------|---------|
| <b>In-Hospital outcomes</b> |                |                |         |
| <b>Need for ICU</b>         | 43 (34.1%)     | 50 (40.7%)     | 0.29    |
| <b>Need for IMV</b>         | 26 (20.6%)     | 19 (15.4%)     | 0.29    |
| <b>Death</b>                | 15 (11.9%)     | 27 (22.0%)     | 0.034   |
| <b>ICU duration (days*)</b> | 7.0 (3.0-14.0) | 5.5 (4.0-9.0)  | 0.34    |
| <b>IMV duration (days*)</b> | 5.5 (2.0-13.0) | 9.0 (5.0-14.0) | 0.099   |

\* Reported as median (IQR)

**Supplementary Table S2: ACEi/ARB use and in-hospital outcomes\***

|                                        | No ACEi/ARB Use | ACEi/ARB Use   | p-value |
|----------------------------------------|-----------------|----------------|---------|
| <b>In-Hospital outcomes</b>            |                 |                |         |
| <b>Need for ICU</b>                    | 47 (33.8%)      | 46 (41.8%)     | 0.19    |
| <b>Need for IMV</b>                    | 22 (15.8%)      | 23 (20.9%)     | 0.30    |
| <b>Death</b>                           | 16 (11.5%)      | 26 (23.6%)     | 0.011   |
| <b>ICU duration (days<sup>†</sup>)</b> | 6.00 (3.0-12.0) | 6.0 (4.0-16.0) | 0.67    |
| <b>IMV duration (days<sup>†</sup>)</b> | 6.00 (2.0-10.0) | 7.0 (5.0-14.0) | 0.17    |

\* ACEi refers to angiotensin converting enzyme inhibitor. ARB refers to angiotensin II receptor blocker; <sup>†</sup> Reported as median (IQR)
